# Supplementary material for: The Effects of Anthropogenic Structures on Habitat Connectivity and the Potential Spread of Non-Native Invertebrate Species in the Offshore Environment
Source: PLOS journal article supplement (doi:10.1371/journal.pone.0152261), 2016-03-31
Supplement: S1 (10.1371/journal.pone.0152261.s001) [file journal.pone.0152261.s001]

## Supporting Information

**S1 Table. Unpublished data from settlement plates at platform Gilda.** Mean number of *Watersipora* colonies on 15 x 15 cm ceramic tile settlement plates deployed and retrieved every three months at platform Gilda from June 2001 through May 2002. Mean number of colonies  $1 \pm \text{SE}$ , n = 4 plates.

| Date                          | No. <i>Watersipora</i> colonies |
|-------------------------------|---------------------------------|
| June - August 2001            | $28 \pm 7$                      |
| September - November 2001     | $3 \pm 2$                       |
| December 2001 - February 2002 | 0                               |
| March - May 2002              | 0                               |
